# Supplementary material for: Sustainable synthesis and characterization of a bisphenol A-free polycarbonate from a six-membered dicyclic carbonate
Source: Royal Society of Chemistry journal article supplement (doi:10.1039/c8py00676h), 2018-01-01

## Electronic Supporting Information (ESI)

### Sustainable Synthesis and Characterization of Bisphenol A-Free Polycarbonate from Six-Membered Dicyclic Carbonate

Pengrui Wang <sup>a,§</sup>, Ji Hoon Park <sup>b,§</sup>, Mahmoud Sayed <sup>c</sup>, Tae-Sun Chang <sup>b</sup>,  
Amy Moran <sup>a</sup>, Shaochen Chen <sup>a,d,\*</sup>, and Sang-Hyun Pyo <sup>c,\*</sup>

<sup>a</sup> *Materials Science and Engineering, University of California-San Diego, La Jolla, California 92093, United States.*

<sup>b</sup> *Greenhouse Gas Resources Research Group, Korea Research Institute of Chemical Technology (KRICT), Daejeon, Republic of Korea*

<sup>c</sup> *Biotechnology, Department of Chemistry, Center for Chemistry and Chemical Engineering, Lund University, SE-22100 Lund, Sweden*

<sup>d</sup> *Department of NanoEngineering, University of California-San Diego, La Jolla, California 92093, United States.*

§ P. Wang and J.H. Park contributed equally to this work.

\*Corresponding Author

S.H. Pyo; [sang-hyun.pyo@biotek.lu.se](mailto:sang-hyun.pyo@biotek.lu.se); S. Chen; [chen168@eng.ucsd.edu](mailto:chen168@eng.ucsd.edu)

Figure S1. Synthesis of BPA-free PC from DTMPC (100 mg) by ROP under various conditions; Effect of temperature. (S2)

Figure S2. Representative GC chromatograms on the synthesis of BPA-free PC from DTMPC. (S3)

Figure S3. Solid state <sup>1</sup>H-NMR (a) and <sup>13</sup>C-NMR (b) of polycarbonate prepared from DTMPC. (S4)

**Figure S1.** Synthesis of BPA-free PC from DTMPCC (100 mg, 0.33mmol) by ROP under various conditions. Effect of temperature under condition of (A) 0.09  $\mu\text{mol}$  TBD and 14  $\mu\text{mol}$  1,3-PDO, (B) 7.2  $\mu\text{mol}$  TEA and 35  $\mu\text{mol}$  1,3-PDO, and (C) 8.2  $\mu\text{mol}$  DMAP and 35  $\mu\text{mol}$  1,3-PDO at 110°C ( $\blacklozenge$ ), 130°C ( $\blacksquare$ ) and 150°C ( $\blacktriangle$ ).

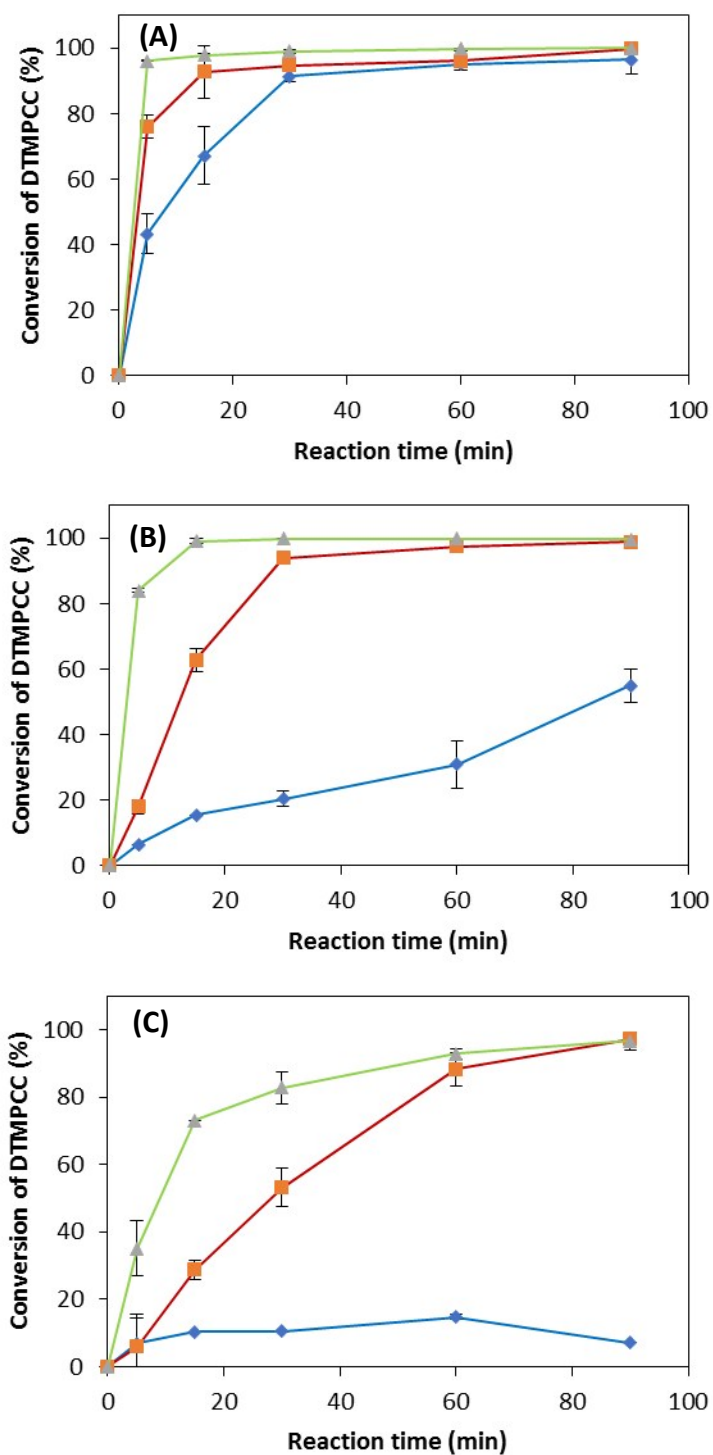

**Figure S2.** Representative GC chromatograms on the synthesis of BPA-free PC from DTMPC (0.33 mmol) by 1.7  $\mu\text{mol}$  DBU and 3.5  $\mu\text{mol}$  1,3-PDO at 130°C. (A) 0.5mg DTMPC/mL, (B) 0.1mg DTMPC/mL, (C) DTMP peak at 5 min reaction, (D) DTMP peak at 15 min reaction, (E) DTMP peak at 30 min reaction (Table 1. Run 12), (F) DTMP peak at 60 min reaction (Table 1. Run 13).

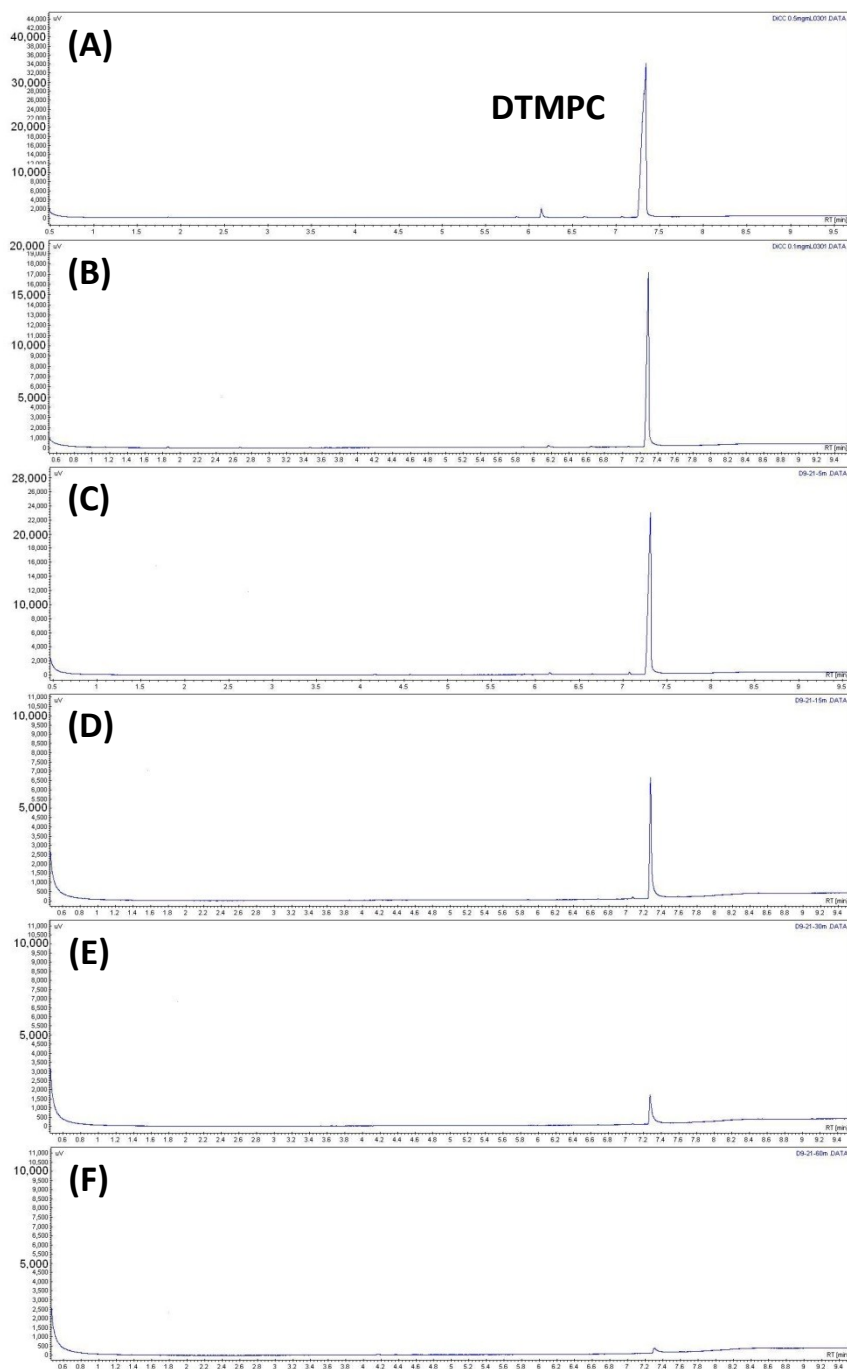

**Figure S3.** Solid state  $^1\text{H}$ -NMR (a) and  $^{13}\text{C}$ -NMR (b) of polycarbonate prepared from DTMPC.

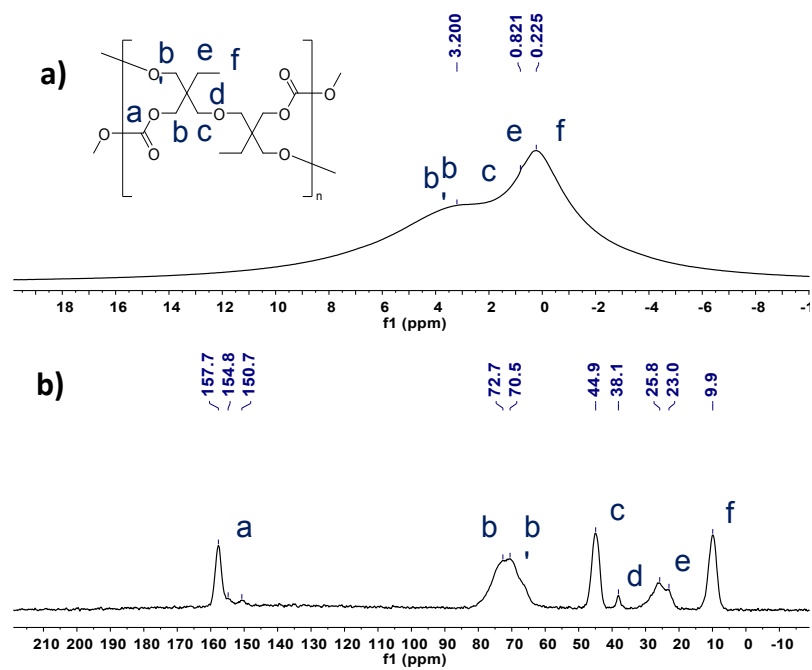

Supplement: c8py00676h1.pdf [file c8py00676h1.pdf]
